# Supplementary material for: Early Zebrafish Embryogenesis Is Susceptible to Developmental TDCPP Exposure
Source: PubMed Central journal article supplement (PMC3556627; doi:10.1289/ehp.1205316), 2012-09-06
Supplement: ehp.1205316.s001.pdf [file ehp.1205316.s001.pdf]

## SUPPLEMENTAL MATERIAL

### Early Zebrafish Embryogenesis Is Susceptible to Developmental TDCPP Exposure

Sean P. McGee, Ellen M. Cooper, Heather M. Stapleton, and David C. Volz

**Table S1.** Electrospray source settings and multiple reaction monitoring ion transitions used to detect TDCPP, BDCPP and mass-labeled internal standards. The source was maintained at 350°C gas temperature, 50 psi nebulizer pressure, and 10 L min<sup>-1</sup> gas flow.

| <b>Compound</b> | <b>Type</b>       | <b>Polarity</b> | <b>Transition<sup>a</sup> (<i>m/z</i>)</b> | <b>Fragmentor<br/>(V)</b> | <b>Collision<br/>Energy (V)</b> |
|-----------------|-------------------|-----------------|--------------------------------------------|---------------------------|---------------------------------|
| TDCPP           | Target analyte    | positive        | 430.9 > 98.9 (Q)<br>430.9 > 102 (q)        | 80<br>80                  | 25<br>15                        |
| D15-TDCPP       | Internal standard | positive        | 446 > 102 (Q)                              | 80                        | 25                              |
| BDCPP           | Target analyte    | negative        | 318.9 > 35.1 (Q)<br>318.9 > 36.9 (q)       | 80<br>80                  | 10<br>10                        |
| D10-BDCPP       | Internal standard | negative        | 328.9 > 35. (Q)                            | 80                        | 10                              |
| D27-TPP         | Internal standard | positive        | 342.3 > 82.2 (Q)                           | 160                       | 35                              |
| D10-DPP         | Internal standard | negative        | 259.1 > 98.0 (Q)                           | 120                       | 30                              |

<sup>a</sup> Transitions for quantifier ions are designated with "Q;" transitions for qualifier ions are designated with "q."
